# Supplementary material
Source: publisher figshare collection journal article supplement (https://frontiersin.figshare.com/ndownloader/files/14364941)
Supplement: Supplementary file [file 14364941]

Table S2. Primers used for amplification of V1-V3 variable regions.

| NAME       | SEQUENCE                                           |
|------------|----------------------------------------------------|
| 534R_YM1-F | ACACTGACGACATGGTTCTACAGTAGAGTTTGATCCTGGCTCAG       |
| 534R_YM2-F | ACACTGACGACATGGTTCTACACGTAGAGTTTGATCATGGCTCAG      |
| 534R_YM3-F | ACACTGACGACATGGTTCTACAACGTAGAGTTTGATTCTGGCTCAG     |
| 534R_YM4-F | ACACTGACGACATGGTTCTACATACGTAGAGTTTGATTATGGCTCAG    |
| 534R_Bif-F | ACACTGACGACATGGTTCTACAGTACGTAGGGTTCGATTCTGGCTCAG   |
| 534R_Bor-F | ACACTGACGACATGGTTCTACACGTACGTAGAGTTTGATCCTGGCTTAG  |
| 534R_ChI-F | ACACTGACGACATGGTTCTACAACGTACGTAGAATTTGATCTTGGTTCAG |
| 27F_1-R    | TACGGTAGCAGAGACTTGGTCTCCATTACCGCGGCTGCTGG          |
| 27F_2-R    | TACGGTAGCAGAGACTTGGTCTGCCATTACCGCGGCTGCTGG         |
| 27F_3-R    | TACGGTAGCAGAGACTTGGTCTTGCCATTACCGCGGCTGCTGG        |
| 27F_4-R    | TACGGTAGCAGAGACTTGGTCTATGCCATTACCGCGGCTGCTGG       |
| 27F_5-R    | TACGGTAGCAGAGACTTGGTCTCATGCCATTACCGCGGCTGCTGG      |
| 27F_6-R    | TACGGTAGCAGAGACTTGGTCTTCATGCCATTACCGCGGCTGCTGG     |
| 27F_7-R    | TACGGTAGCAGAGACTTGGTCTATCATGCCATTACCGCGGCTGCTGG    |
